# Supplementary material
Source: Springer Nature journal article supplement (https://www.springermedizin.de/resource/supplementary/12890_2010_252_MOESM6_ESM.pdf/9504796)
Supplement: MOESM6 [file 9504796]

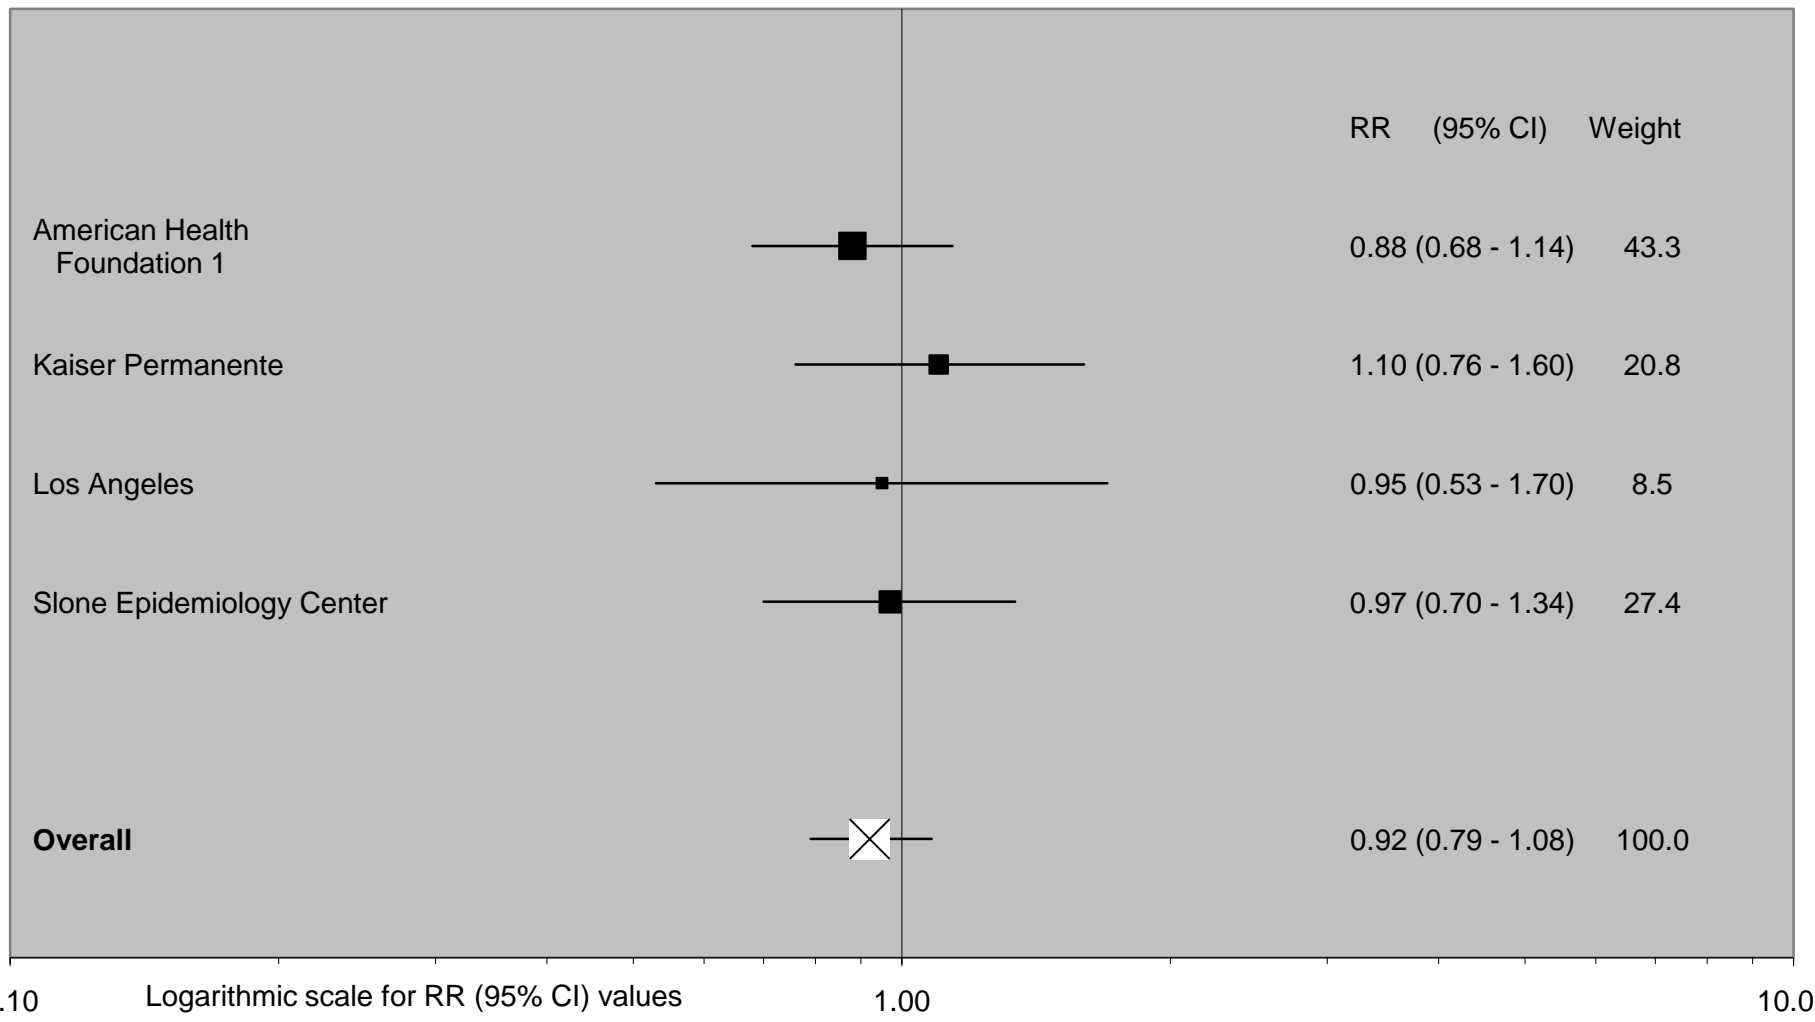

RR (95% CI) Weight

American Health Foundation 1

0.88 (0.68 - 1.14) 43.3

Kaiser Permanente

1.10 (0.76 - 1.60) 20.8

Los Angeles

0.95 (0.53 - 1.70) 8.5

Slone Epidemiology Center

0.97 (0.70 - 1.34) 27.4

**Overall**

**0.92 (0.79 - 1.08) 100.0**

0.10      Logarithmic scale for RR (95% CI) values      1.00      10.00
